# Supplementary material for: Structural insights into the potency of SK channel positive modulators
Source: PubMed Central journal article supplement (PMC5719431; doi:10.1038/s41598-017-16607-8), 2017-12-07
Supplement: 41598_2017_16607_MOESM1_ESM.pdf [file 41598_2017_16607_MOESM1_ESM.pdf]

## Supplementary Information

### Structural insights into the potency of SK channel positive modulators

Young-Woo Nam <sup>1</sup>, Razan Orfali <sup>1</sup>, Tingting Liu <sup>2,3</sup>, Kunqian Yu <sup>2,3</sup>, Meng Cui <sup>4</sup>, Heike Wulff <sup>5</sup>, Miao Zhang <sup>1,\*</sup>

<sup>1</sup> Department of Biomedical and Pharmaceutical Sciences & Structural Biology  
Research Center, Chapman University School of Pharmacy, Irvine, CA, 92618, USA

<sup>2</sup> State Key Laboratory of Drug Research, Shanghai Institute of Materia Medica,  
Chinese Academy of Sciences, Shanghai, 201203, China

<sup>3</sup> University of Chinese Academy of Sciences, Beijing, 100049, China

<sup>4</sup> Department of Pharmaceutical Sciences, Northeastern University School of  
Pharmacy, Boston, MA, 02115, USA

<sup>5</sup> Department of Pharmacology, School of Medicine, University of California, Davis,  
CA, 95616, USA

\* Correspondence should be addressed to M.Z. (zhang@chapman.edu)

Running title: Positive modulation of SK channels

Email: zhang@chapman.edu

Phone: 1-714-516-5478

Department of Biomedical and Pharmaceutical Sciences

Chapman University School of Pharmacy

9501 Jeronimo Road

Irvine, CA 92618

**Table 1.** Crystallographic statistics

| Data Collection <sup>a</sup>              |                                                                                             |                                                                                             |
|-------------------------------------------|---------------------------------------------------------------------------------------------|---------------------------------------------------------------------------------------------|
|                                           | CaM-CaMBD2-a with SKS-11                                                                    | CaM-CaMBD2-a with SKS-14                                                                    |
| Space Group                               | C2                                                                                          | C2                                                                                          |
| Unit Cell Dimensions                      | a=77.3 Å, b=66.1 Å,<br>c=65.4 Å<br>$\alpha=90.0^\circ, \beta=93.8^\circ, \gamma=90.0^\circ$ | a=77.0 Å, b=66.0 Å,<br>c=65.3 Å<br>$\alpha=90.0^\circ, \beta=93.8^\circ, \gamma=90.0^\circ$ |
| Wavelength (Å)                            | 1.3148                                                                                      | 1.3424                                                                                      |
| Resolution range (Å)                      | 26.84–1.9 (1.95-1.88)                                                                       | 27.86-2.30 (2.38-2.30)                                                                      |
| Completeness (%)                          | 98.4 (84.4)                                                                                 | 99.6 (99.9)                                                                                 |
| Total Observations                        | 165,310 (4,536)                                                                             | 95,275 (8,569)                                                                              |
| Unique Observations                       | 25,882 (1,568)                                                                              | 14,551 (1,431)                                                                              |
| Mean Redundancy                           | 6.4 (2.9)                                                                                   | 6.5 (6.0)                                                                                   |
| Mean I/ $\sigma$ (I)                      | 14.9 (3.2)                                                                                  | 19.9 (8.7)                                                                                  |
| R <sub>merge</sub> <sup>b</sup>           | 0.073 (0.368)                                                                               | 0.057 (0.156)                                                                               |
| R <sub>pim</sub> <sup>c</sup>             | 0.029 (0.245)                                                                               | 0.024 (0.068)                                                                               |
| Model Refinement <sup>a</sup>             |                                                                                             |                                                                                             |
| Resolution Range (Å)                      | 25.79-1.9 (1.97-1.9)                                                                        | 25.69-2.3 (2.38-2.3)                                                                        |
| No. reflections                           | 24,969 (2,043)                                                                              | 14,509 (1,424)                                                                              |
| R <sub>work</sub> <sup>d</sup>            | 0.188 (0.307)                                                                               | 0.196 (0.28)                                                                                |
| R <sub>free</sub> <sup>d</sup>            | 0.242 (0.398)                                                                               | 0.248 (0.36)                                                                                |
| No. atoms / Avg. B (Å <sup>2</sup> )      | 2,197/32.7                                                                                  | 2,157/34.8                                                                                  |
| protein                                   | 1,931/31.4                                                                                  | 1,931/34.0                                                                                  |
| calcium ions                              | 2/35.2                                                                                      | 2/47.9                                                                                      |
| solvent                                   | 218/38.7                                                                                    | 175/34.6                                                                                    |
| ligand                                    | 48/56.1                                                                                     | 51/64.9                                                                                     |
| Phi/Psi angles favored (%) / outliers (#) | 99.6/0.4                                                                                    | 99.6/0.4                                                                                    |
| r.m.s.d. bond angles (°)                  | 1.1                                                                                         | 1.5                                                                                         |
| r.m.s.d. bond lengths (Å)                 | 0.007                                                                                       | 0.008                                                                                       |

<sup>a</sup> Values in parentheses refer to data in the highest resolution shell.

<sup>b</sup>  $R_{\text{merge}} = \sum_{hkl} \sum_j |I_j - \langle I \rangle| / \sum_{hkl} \sum_j I_j$ .  $\langle I \rangle$  is the mean intensity of  $j$  observations of reflection  $hkl$  and its symmetry equivalents.

<sup>c</sup>  $R_{\text{pim}}$  (precision-indicating merge) =  $\sum_{hkl} (1/n_{hkl} - 1)^{1/2} \sum_j |I_j - \langle I \rangle| / \sum_{hkl} \sum_j I_j$ .  $n$  is the number of observations of reflection  $hkl$ .

<sup>d</sup>  $R_{\text{cryst}} = \sum_{hkl} |F_{\text{obs}} - kF_{\text{calc}}| / \sum_{hkl} |F_{\text{obs}}|$ .  $R_{\text{free}} = R_{\text{cryst}}$  for 5% of reflections excluded from crystallographic refinement.

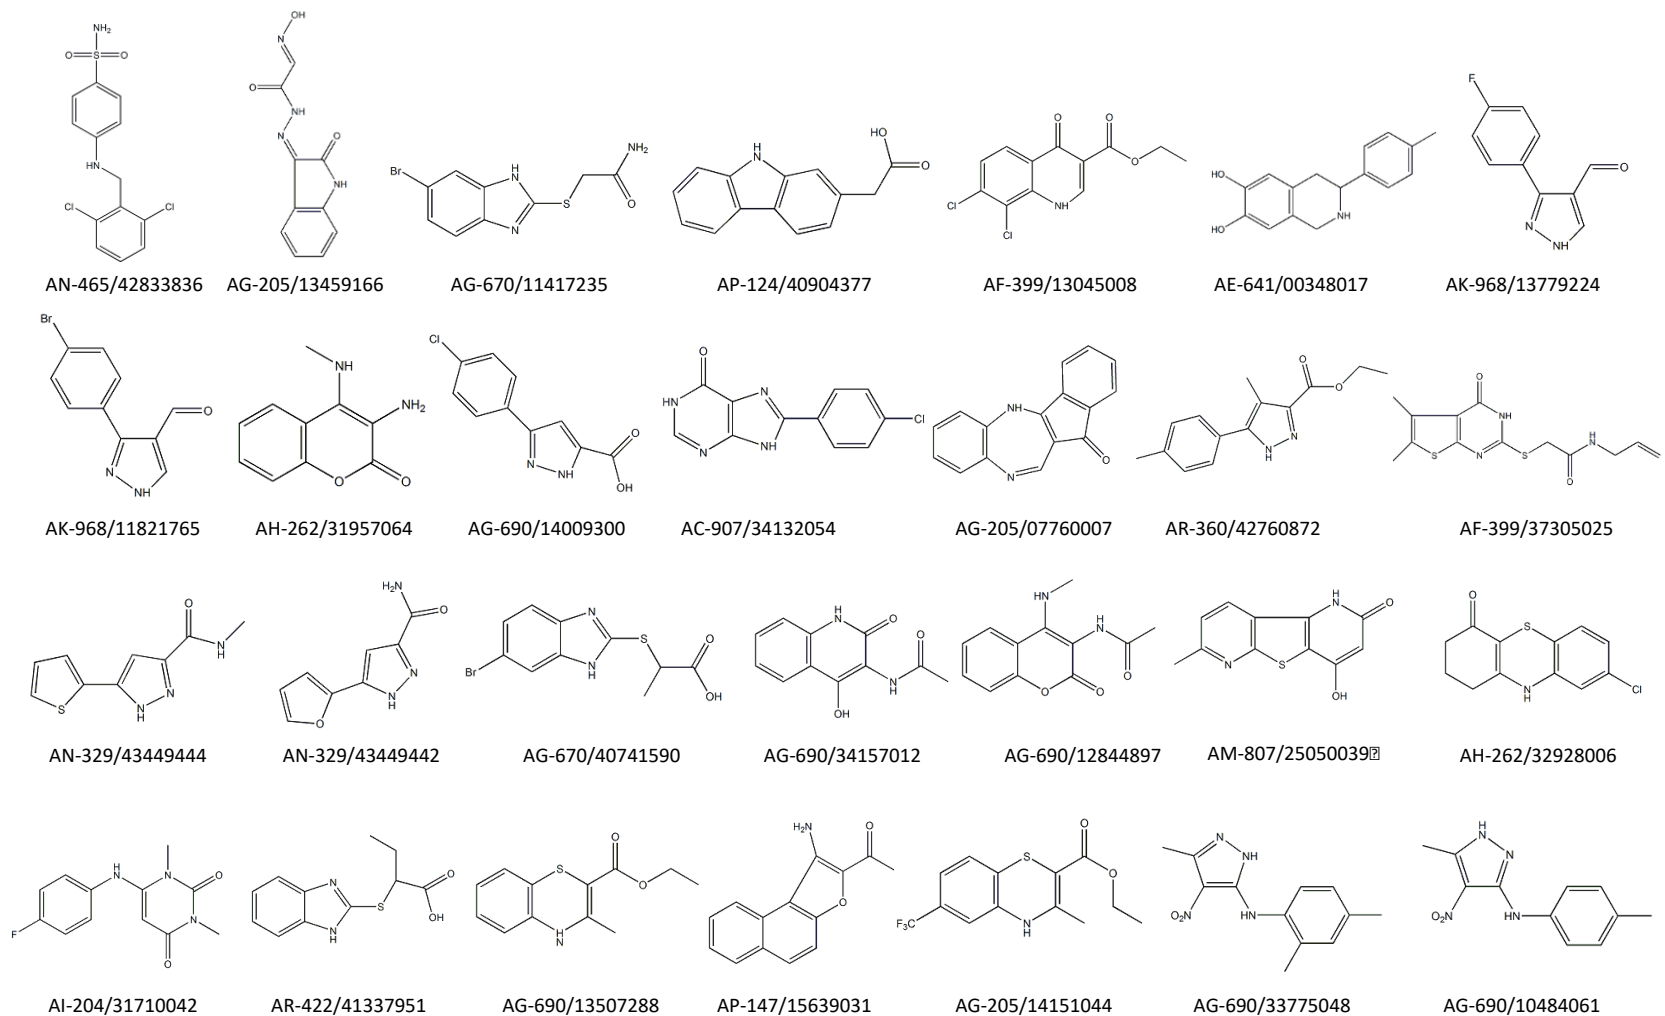

**Figure S1. The inactive compounds tested experimentally.** Chemical structures and Specs ID ([www.specs.net](http://www.specs.net)) of the 28 compounds tested inactive are shown.

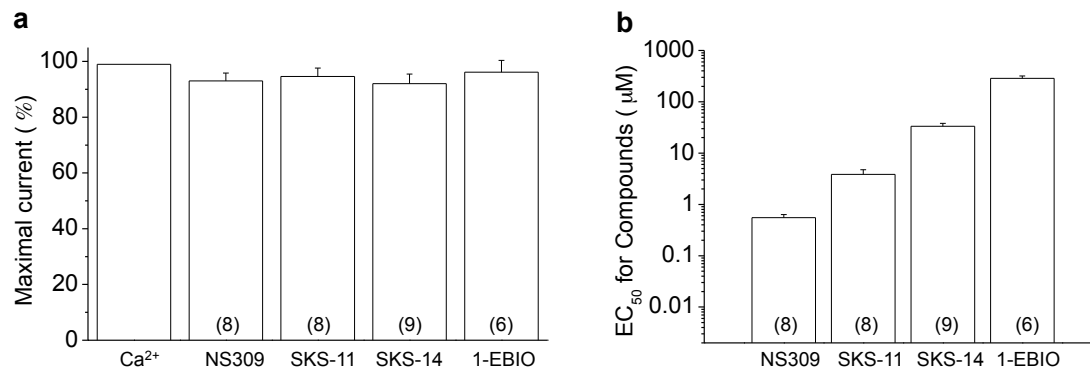

**Figure S2. The efficacy and potency of NS309, SKS-11, SKS-14 and 1-EBIO.** (a) The maximal responses to compounds are normalized by the SK2 current induced by saturating 10  $\mu\text{M}$   $\text{Ca}^{2+}$ . (b) The potency ( $\text{EC}_{50}$ ) of the four compounds in potentiating the SK2 current is different from each other. All data are presented in mean  $\pm$  s.e.m. The numbers of experiments are shown in the parentheses.

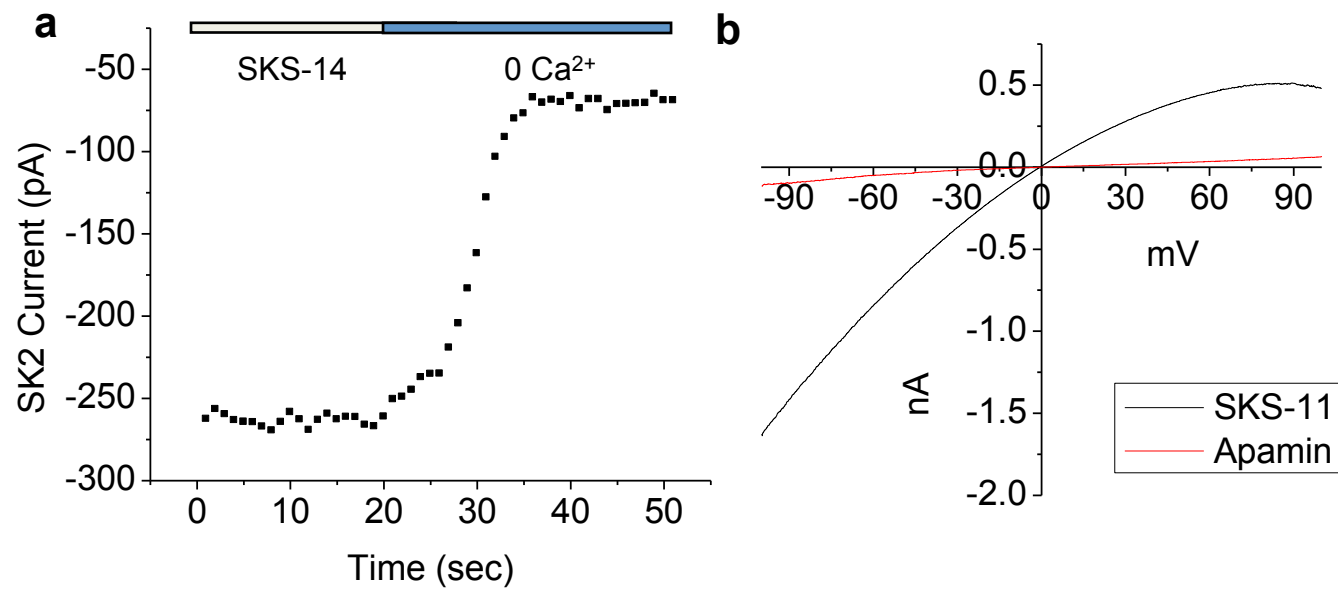

**Figure S3. Control experiments of SK2 current.** (a) In inside-out patch recordings, 0 Ca<sup>2+</sup> inhibited the current induced by SKS-14 (100  $\mu$ M) in the presence of 0.1  $\mu$ M Ca<sup>2+</sup>. (b) In whole-cell recordings, apamin inhibited the current induced by SKS-11 (30  $\mu$ M).
